# Supplementary material for: Gold nanoparticle density-multiplication by tuning block copolymer self-assembly processes toward increased charge storage
Source: Royal Society of Chemistry journal article supplement (doi:10.1039/c5tc02154e), 2015-01-01
Supplement: c5tc02154e1.pdf [file c5tc02154e1.pdf]

### Supporting Information

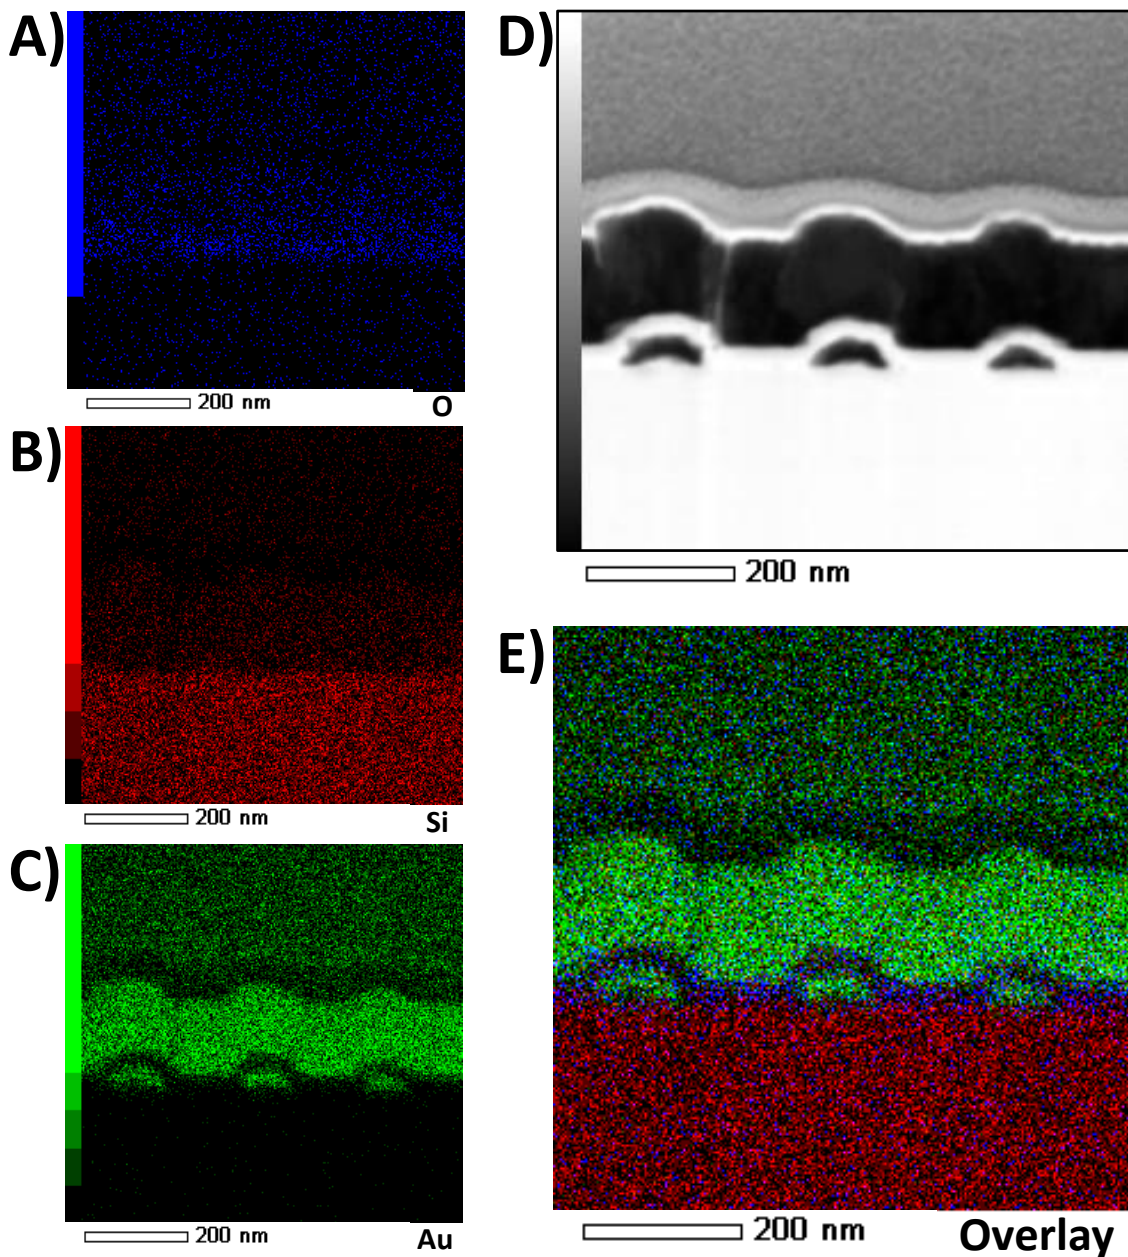

**Figure S1.** STEM images that map different layers of the gold nanoparticle cluster capacitive device stack with A) oxygen from the tunnel  $\text{SiO}_2$ , B) silicon substrate and C) gold from charge storage centers and top electrode. D) Cross section TEM image of the device with its composition identified and overlaid in E).

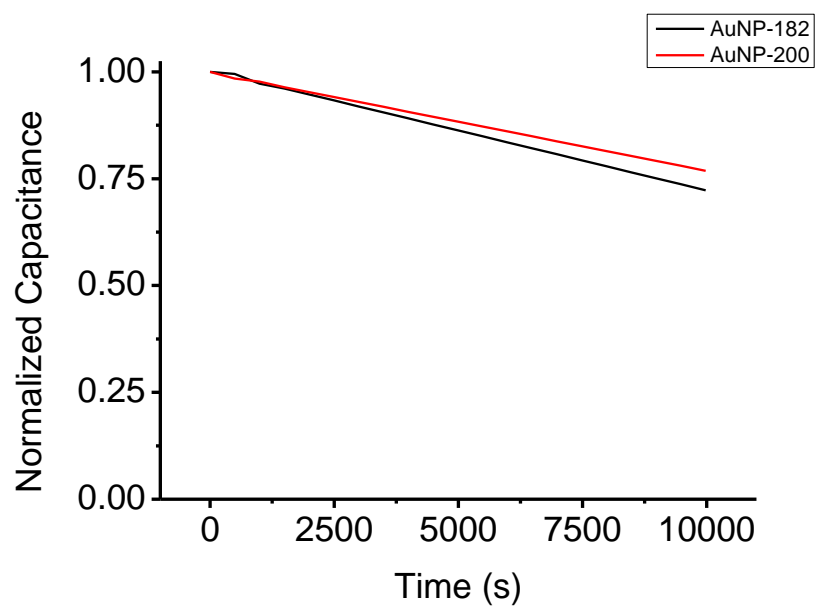

**Figure S2.** The retention characteristics of the gold nanocluster arrays (AuNP-182 and AuNP-200) show that close to 75% of the charge is retained after discharging the device for 10,000s.
